# Supplementary material for: The Impact of Asking Intention or Self-Prediction Questions on Subsequent Behavior: A Meta-Analysis
Source: PubMed Central journal article supplement (PMC4931712; doi:10.1177/1088868315592334), 2015-07-10
Supplement: 10.1177_1088868315592334_AppendixB.pdf [file 10.1177_1088868315592334_AppendixB.pdf]

Appendix B

*Moderator Coding of Question, Behavior and Methodological Characteristics for Studies Included in the Meta-Analysis.*

| Author(s) and publication year | Study (comparison) <sup>a</sup> | Question characteristics |                  |                 |                            |                        | Behaviour characteristics |                        |                          |                            |                         |                         | Methodological characteristics |                            |                           |                 |                      |                          |
|--------------------------------|---------------------------------|--------------------------|------------------|-----------------|----------------------------|------------------------|---------------------------|------------------------|--------------------------|----------------------------|-------------------------|-------------------------|--------------------------------|----------------------------|---------------------------|-----------------|----------------------|--------------------------|
|                                |                                 | Q Type <sup>b</sup>      | TPB <sup>c</sup> | AR <sup>d</sup> | N Pred/Int Qs <sup>e</sup> | N Beh. Qs <sup>f</sup> | Beh. Exp. <sup>g</sup>    | Beh. Dom. <sup>h</sup> | Social Des. <sup>i</sup> | Diff. of Beh. <sup>j</sup> | Beh. Freq. <sup>k</sup> | Beh. Meas. <sup>l</sup> | Time Int. <sup>m</sup>         | Pers. Contact <sup>n</sup> | Res. Setting <sup>o</sup> | RR <sup>p</sup> | Incent. <sup>q</sup> | Sample Type <sup>r</sup> |
| Ayres et al. (2013)            | 1                               | MIX                      | TPB              | AR              | 2                          | 8                      | NO                        | HEA                    | 4                        | 2                          | OT                      | OB                      | 0                              | IMP                        | FD                        | 1.00            | Y                    | NS                       |
| Chandon et al. (2004)          | 1(1)                            | MIX                      | NO               | NO              | 2                          | 2                      | HI                        | CON                    | 2                        | 2                          | REP                     | OB                      | 270                            | PER                        | FD                        | 1.00            | N                    | NS                       |
| Chandon et al. (2004)          | 1(2)                            | MIX                      | NO               | NO              | 2                          | 2                      | HI                        | CON                    | 2                        | 2                          | REP                     | OB                      | 60                             | PER                        | FD                        | 1.00            | N                    | NS                       |
| Chandon et al. (2011)          | 1(1)                            | PRED                     | NO               | NO              | 1                          | 4                      | VAR                       | HEA                    | 4                        | 3                          | REP                     | SR                      | 7                              | IMP                        | FD                        | 1.00            | N                    | S                        |
| Chandon et al. (2011)          | 1(2)                            | PRED                     | NO               | NO              | 1                          | 4                      | VAR                       | OTH                    | 3                        | 1                          | REP                     | SR                      | 7                              | IMP                        | FD                        | 1.00            | N                    | S                        |
| Chapman (2001)                 | 2(1)                            | PRED                     | NO               | NO              | 6                          | 6                      | VAR                       | PRO                    | 3                        | 2                          | OT                      | OB                      | 1                              | IMP                        | FD                        | 1.00            | N                    | S                        |
| Chapman (2001)                 | 2(2)                            | PRED                     | NO               | NO              | 6                          | 6                      | VAR                       | PRO                    | 3                        | 2                          | OT                      | OB                      | 6                              | IMP                        | FD                        | 1.00            | N                    | S                        |
| Chapman (2001)                 | 2(3)                            | PRED                     | NO               | NO              | 1                          | 1                      | VAR                       | PRO                    | 3                        | 2                          | OT                      | OB                      | 1                              | IMP                        | FD                        | 1.00            | N                    | S                        |
| Chapman (2001)                 | 2(4)                            | PRED                     | NO               | NO              | 1                          | 1                      | VAR                       | PRO                    | 3                        | 2                          | OT                      | OB                      | 6                              | IMP                        | FD                        | 1.00            | N                    | S                        |
| Cioffi & Garner (1998)         | 1(1)                            | INT                      | NO               | NO              | 1                          | 1                      | VAR                       | PRO                    | 4                        | 4                          | OT                      | OB                      | 7                              | IMP                        | FD                        | 0.30            | N                    | S                        |
| Cioffi & Garner (1998)         | 1(2)                            | INT                      | NO               | NO              | 1                          | 1                      | VAR                       | PRO                    | 4                        | 4                          | OT                      | OB                      | 7                              | IMP                        | FD                        | 0.19            | N                    | S                        |
| Cioffi & Garner (1998)         | 1(3)                            | INT                      | NO               | NO              | 1                          | 1                      | VAR                       | PRO                    | 4                        | 4                          | OT                      | OB                      | 7                              | IMP                        | FD                        | 0.64            | N                    | S                        |
| Conner et al. (2011)           | 1                               | MIX                      | TPB              | NO              | 3                          | 22                     | VAR                       | HEA                    | 5                        | 3                          | OT                      | OB                      | 120                            | IMP                        | FD                        | 0.47            | N                    | NS                       |
| Conner et al. (2011)           | 2                               | MIX                      | TPB              | AR              | 3                          | 34                     | VAR                       | HEA                    | 5                        | 2                          | OT                      | OB                      | 60                             | IMP                        | FD                        | 0.72            | N                    | NS                       |
| Cox et al. (2012)              | 1(1)                            | PRED                     | NO               | NO              | 3                          | 19                     | NO                        | HEA                    | 5                        | 5                          | OT                      | OB                      | 0                              | IMP                        | FD                        | 1.00            | Y                    | NS                       |
| Cox et al. (2012)              | 1(2)                            | PRED                     | NO               | NO              | 3                          | 19                     | NO                        | HEA                    | 5                        | 2                          | OT                      | OB                      | 0                              | IMP                        | FD                        | 1.00            | Y                    | NS                       |
| Fitzsimons & Williams (2000)   | 1(1)                            | PRED                     | NO               | NO              | 1                          | 7                      | NO                        | CON                    | 3                        | 1                          | OT                      | OB                      | 0                              | IMP                        | LB                        | 1.00            | Y                    | MIX                      |
| Fitzsimons & Williams (2000)   | 1(2)                            | PRED                     | NO               | NO              | 1                          | 7                      | NO                        | CON                    | 3                        | 1                          | OT                      | OB                      | 0                              | IMP                        | LB                        | 1.00            | Y                    | MIX                      |
| Fitzsimons & Williams (2000)   | 1(3)                            | PRED                     | NO               | NO              | 1                          | 7                      | NO                        | CON                    | 3                        | 1                          | OT                      | OB                      | 0                              | IMP                        | LB                        | 1.00            | Y                    | MIX                      |
| Fitzsimons & Williams (2000)   | 1(4)                            | PRED                     | NO               | NO              | 1                          | 7                      | NO                        | CON                    | 3                        | 1                          | OT                      | OB                      | 0                              | IMP                        | LB                        | 1.00            | Y                    | MIX                      |
| Fitzsimons & Williams (2000)   | 2(1)                            | PRED                     | NO               | NO              | 1                          | 6                      | VAR                       | PRO                    | 5                        | 2                          | OT                      | OB                      | 0                              | IMP                        | LB                        | 1.00            | Y                    | S                        |
| Fitzsimons & Williams (2000)   | 2(2)                            | PRED                     | NO               | NO              | 1                          | 6                      | VAR                       | PRO                    | 5                        | 2                          | OT                      | OB                      | 0                              | IMP                        | LB                        | 1.00            | Y                    | S                        |
| Fitzsimons & Williams (2000)   | 2(3)                            | PRED                     | NO               | NO              | 1                          | 6                      | VAR                       | PRO                    | 5                        | 2                          | OT                      | OB                      | 0                              | IMP                        | LB                        | 1.00            | Y                    | S                        |
| Fitzsimons & Williams (2000)   | 2(4)                            | PRED                     | NO               | NO              | 1                          | 6                      | VAR                       | PRO                    | 5                        | 2                          | OT                      | OB                      | 0                              | IMP                        | LB                        | 1.00            | Y                    | S                        |
| Fitzsimons et al. (2007)       | 1                               | PRED                     | NO               | NO              | 1                          | 1                      | VAR                       | UND                    | 1                        | 2                          | REP                     | OB                      | 112                            | IMP                        | FD                        | 1.00            | Y                    | S                        |
| Fitzsimons et al. (2007)       | 4(1)                            | PRED                     | NO               | NO              | 1                          | 1                      | VAR                       | UND                    | 3                        | 1                          | REP                     | SR                      | 7                              | IMP                        | FD                        | 1.00            | Y                    | S                        |
| Fitzsimons et al. (2007)       | 4(2)                            | PRED                     | NO               | NO              | 1                          | 1                      | VAR                       | UND                    | 2                        | 1                          | REP                     | SR                      | 7                              | IMP                        | FD                        | 1.00            | Y                    | S                        |
| Godin et al. (2008)            | 1(1)                            | MIX                      | TPB              | AR              | 3                          | 77                     | HI                        | PRO                    | 4                        | 4                          | REP                     | OB                      | 365                            | IMP                        | FD                        | 0.82            | N                    | NS                       |
| Godin et al. (2008)            | 1(2)                            | MIX                      | TPB              | AR              | 3                          | 77                     | HI                        | PRO                    | 4                        | 4                          | REP                     | OB                      | 180                            | IMP                        | FD                        | 0.82            | N                    | NS                       |
| Godin et al. (2010)            | 1(1)                            | MIX                      | NO               | AR              | 3                          | 6                      | NO                        | PRO                    | 4                        | 5                          | REP                     | OB                      | 365                            | IMP                        | FD                        | 0.40            | N                    | NS                       |
| Godin et al. (2010)            | 1(2)                            | MIX                      | NO               | AR              | 3                          | 6                      | NO                        | PRO                    | 4                        | 5                          | REP                     | OB                      | 180                            | IMP                        | FD                        | 0.40            | N                    | NS                       |
| Godin et al. (2010)            | 1(3)                            | MIX                      | NO               | AR              | 3                          | 3                      | NO                        | PRO                    | 4                        | 5                          | REP                     | OB                      | 365                            | IMP                        | FD                        | 0.42            | N                    | NS                       |
| Godin et al. (2010)            | 1(4)                            | MIX                      | NO               | AR              | 3                          | 3                      | NO                        | PRO                    | 4                        | 5                          | REP                     | OB                      | 180                            | IMP                        | FD                        | 0.42            | N                    | NS                       |
| Godin et al. (2011)            | 1                               | MIX                      | TPB              | AR              | 3                          | 47                     | VAR                       | HEA                    | 5                        | 5                          | REP                     | SR                      | 90                             | IMP                        | FD                        | 1.00            | N                    | MIX                      |
| Greenwald et al. (1987)        | 1                               | PRED                     | NO               | NO              | 1                          | 4                      | NO                        | PRO                    | 5                        | 2                          | OT                      | MIX                     | 2                              | PER                        | FD                        | 1.00            | N                    | S                        |
| Greenwald et al. (1987)        | 2                               | PRED                     | NO               | NO              | 1                          | 4                      | VAR                       | PRO                    | 5                        | 3                          | OT                      | MIX                     | 1                              | PER                        | FD                        | 1.00            | N                    | S                        |

| Author(s) and publication year  | Study (comparison) <sup>a</sup> | Question characteristics |                  |                 |                            |                        | Behaviour characteristics |                        |                          |                            |                         |                         | Methodological characteristics |                            |                           |                 |                      |                          |
|---------------------------------|---------------------------------|--------------------------|------------------|-----------------|----------------------------|------------------------|---------------------------|------------------------|--------------------------|----------------------------|-------------------------|-------------------------|--------------------------------|----------------------------|---------------------------|-----------------|----------------------|--------------------------|
|                                 |                                 | Q Type <sup>b</sup>      | TPB <sup>c</sup> | AR <sup>d</sup> | N Pred/Int Qs <sup>e</sup> | N Beh. Qs <sup>f</sup> | Beh. Exp. <sup>g</sup>    | Beh. Dom. <sup>h</sup> | Social Des. <sup>i</sup> | Diff. of Beh. <sup>j</sup> | Beh. Freq. <sup>k</sup> | Beh. Meas. <sup>l</sup> | Time Int. <sup>m</sup>         | Pers. Contact <sup>n</sup> | Res. Setting <sup>o</sup> | RR <sup>p</sup> | Incent. <sup>q</sup> | Sample Type <sup>r</sup> |
| Janiszewski & Chandon (2007)    | 4(1)                            | MIX                      | NO               | NO              | 1                          | 17                     | VAR                       | CON                    | 3                        | 1                          | OT                      | OB                      | 0                              | IMP                        | LB                        | 1.00            | Y                    | S                        |
| Janiszewski & Chandon (2007)    | 4(2)                            | MIX                      | NO               | NO              | 1                          | 17                     | VAR                       | CON                    | 3                        | 1                          | OT                      | OB                      | 0                              | IMP                        | LB                        | 1.00            | Y                    | S                        |
| Lawrence & Ferguson (2012)      | 3(1)                            | INT                      | NO               | NO              | 1                          | 2                      | VAR                       | HEA                    | 5                        | 5                          | REP                     | SR                      | 60                             | IMP                        | FD                        | 0.51            | N                    | S                        |
| Lawrence & Ferguson (2012)      | 3(2)                            | INT                      | NO               | NO              | 1                          | 2                      | VAR                       | HEA                    | 4                        | 4                          | REP                     | SR                      | 60                             | IMP                        | FD                        | 0.51            | N                    | S                        |
| Lawrence & Ferguson (2012)      | 3(3)                            | INT                      | NO               | NO              | 1                          | 2                      | VAR                       | HEA                    | 4                        | 3                          | REP                     | SR                      | 60                             | IMP                        | FD                        | 0.51            | N                    | S                        |
| Lawrence & Ferguson (2012)      | 3(4)                            | INT                      | NO               | NO              | 1                          | 2                      | VAR                       | HEA                    | 4                        | 3                          | REP                     | SR                      | 60                             | IMP                        | FD                        | 0.51            | N                    | S                        |
| Lawrence & Ferguson (2012)      | 3(5)                            | INT                      | NO               | NO              | 1                          | 2                      | VAR                       | OTH                    | 5                        | 2                          | REP                     | SR                      | 60                             | IMP                        | FD                        | 0.51            | N                    | S                        |
| Levav & Fitzsimons (2006)       | 1                               | PRED                     | NO               | NO              | 1                          | 1                      | VAR                       | HEA                    | 4                        | 2                          | REP                     | SR                      | 14                             | IMP                        | FD                        | 1.00            | N                    | S                        |
| Levav & Fitzsimons (2006)       | 2(1)                            | PRED                     | NO               | NO              | 1                          | 1                      | VAR                       | UND                    | 3                        | 3                          | OT                      | SR                      | 0                              | IMP                        | LB                        | 1.00            | N                    | S                        |
| Levav & Fitzsimons (2006)       | 2(2)                            | PRED                     | NO               | NO              | 1                          | 1                      | VAR                       | UND                    | 3                        | 3                          | OT                      | SR                      | 0                              | IMP                        | LB                        | 1.00            | N                    | S                        |
| Levav & Fitzsimons (2006)       | 2(3)                            | PRED                     | NO               | NO              | 1                          | 1                      | VAR                       | UND                    | 3                        | 3                          | OT                      | SR                      | 0                              | IMP                        | LB                        | 1.00            | N                    | S                        |
| Levav & Fitzsimons (2006)       | 3(1)                            | PRED                     | NO               | NO              | 1                          | 1                      | VAR                       | OTH                    | 4                        | 1                          | REP                     | SR                      | 7                              | IMP                        | FD                        | 1.00            | N                    | S                        |
| Levav & Fitzsimons (2006)       | 3(2)                            | PRED                     | NO               | NO              | 1                          | 1                      | VAR                       | HEA                    | 4                        | 2                          | REP                     | SR                      | 7                              | IMP                        | FD                        | 1.00            | N                    | S                        |
| Manstead et al. (1983)          | 1(1)                            | INT                      | TPB              | NO              | 1                          | 37                     | VAR                       | PRO                    | 5                        | 3                          | OT                      | SR                      | 180                            | IMP                        | FD                        | 1.00            | N                    | NS                       |
| Manstead et al. (1983)          | 1(2)                            | INT                      | TPB              | NO              | 1                          | 40                     | NO                        | PRO                    | 5                        | 4                          | OT                      | SR                      | 180                            | IMP                        | FD                        | 1.00            | N                    | NS                       |
| Morwitz & Fitzsimons (2004)     | 2(1)                            | PRED                     | NO               | NO              | 1                          | 3                      | NO                        | CON                    | 3                        | 1                          | OT                      | OB                      | 0                              | IMP                        | LB                        | 1.00            | N                    | S                        |
| Morwitz & Fitzsimons (2004)     | 2(2)                            | PRED                     | NO               | NO              | 1                          | 3                      | NO                        | CON                    | 3                        | 1                          | OT                      | OB                      | 0                              | IMP                        | LB                        | 1.00            | N                    | S                        |
| Morwitz & Fitzsimons (2004)     | 3(1)                            | PRED                     | NO               | NO              | 1                          | 7                      | NO                        | CON                    | 3                        | 1                          | OT                      | OB                      | 0                              | IMP                        | LB                        | 1.00            | N                    | S                        |
| Morwitz & Fitzsimons (2004)     | 3(2)                            | PRED                     | NO               | NO              | 1                          | 7                      | NO                        | CON                    | 3                        | 1                          | OT                      | OB                      | 0                              | IMP                        | LB                        | 1.00            | N                    | S                        |
| Morwitz et al. (1993)           | 1(1)                            | PRED                     | NO               | NO              | 1                          | 2                      | VAR                       | CON                    | 3                        | 4                          | OT                      | SR                      | 180                            | IMP                        | FD                        | 1.00            | N                    | NS                       |
| Morwitz et al. (1993)           | 1(2)                            | INT                      | NO               | NO              | 1                          | 2                      | HI                        | CON                    | 3                        | 3                          | OT                      | SR                      | 180                            | IMP                        | FD                        | 1.00            | N                    | NS                       |
| Morwitz et al. (1993)           | 1(3)                            | INT                      | NO               | NO              | 1                          | 2                      | NO                        | CON                    | 3                        | 4                          | OT                      | SR                      | 180                            | IMP                        | FD                        | 1.00            | N                    | NS                       |
| Obermiller & Spangenberg (2000) | 1                               | PRED                     | NO               | NO              | 1                          | 1                      | VAR                       | PRO                    | 5                        | 2                          | OT                      | OB                      | 85                             | PER                        | FD                        | 1.00            | N                    | NS                       |
| Obermiller et al. (1992)        | 1                               | PRED                     | NO               | NO              | 1                          | 2                      | VAR                       | PRO                    | 5                        | 2                          | OT                      | OB                      | 28                             | PER                        | FD                        | 1.00            | N                    | NS                       |
| Sandberg & Conner (2009)        | 1(1)                            | MIX                      | TPB              | AR              | 2                          | 19                     | VAR                       | HEA                    | 5                        | 5                          | OT                      | OB                      | 120                            | IMP                        | FD                        | 0.13            | Y                    | NS                       |
| Sandberg & Conner (2009)        | 1(2)                            | MIX                      | TPB              | NO              | 2                          | 13                     | VAR                       | HEA                    | 5                        | 5                          | OT                      | OB                      | 120                            | IMP                        | FD                        | 0.14            | Y                    | NS                       |
| Sherman (1980)                  | 1                               | PRED                     | NO               | NO              | 1                          | 1                      | NO                        | OTH                    | 4                        | 2                          | OT                      | OB                      | 14                             | PER                        | FD                        | 1.00            | N                    | S                        |
| Sherman (1980)                  | 3                               | PRED                     | NO               | NO              | 1                          | 1                      | VAR                       | PRO                    | 5                        | 3                          | OT                      | OB                      | 3                              | PER                        | FD                        | 1.00            | N                    | NS                       |
| Smith et al. (2003)             | 1(1)                            | PRED                     | NO               | NO              | 1                          | 3                      | HI                        | PRO                    | 5                        | 2                          | OT                      | OB                      | 2                              | PER                        | FD                        | 1.00            | N                    | NS                       |
| Smith et al. (2003)             | 1(2)                            | PRED                     | NO               | NO              | 1                          | 4                      | HI                        | PRO                    | 5                        | 2                          | OT                      | OB                      | 2                              | PER                        | FD                        | 1.00            | N                    | NS                       |
| Spangenberg & Greenwald (1999)  | Prelim.                         | PRED                     | NO               | NO              | 1                          | 1                      | NO                        | OTH                    | 3                        | 1                          | REP                     | OB                      | 0                              | IMP                        | LB                        | 1.00            | Y                    | S                        |
| Spangenberg & Greenwald (1999)  | 1                               | PRED                     | NO               | NO              | 1                          | 1                      | NO                        | OTH                    | 3                        | 1                          | REP                     | OB                      | 0                              | IMP                        | LB                        | 1.00            | Y                    | S                        |
| Spangenberg & Greenwald (1999)  | 2(1)                            | PRED                     | NO               | NO              | 1                          | 1                      | NO                        | OTH                    | 3                        | 1                          | REP                     | OB                      | 0                              | IMP                        | LB                        | 1.00            | Y                    | S                        |
| Spangenberg & Greenwald (1999)  | 2(2)                            | PRED                     | NO               | NO              | 1                          | 1                      | NO                        | OTH                    | 3                        | 1                          | REP                     | OB                      | 0                              | IMP                        | LB                        | 1.00            | Y                    | S                        |
| Spangenberg & Obermiller (1996) | 1                               | PRED                     | NO               | NO              | 1                          | 1                      | VAR                       | UND                    | 1                        | 3                          | OT                      | OB                      | 2                              | IMP                        | FD                        | 1.00            | Y                    | S                        |
| Spangenberg & Sprott (2006)     | 1(1)                            | PRED                     | NO               | NO              | 1                          | 1                      | VAR                       | HEA                    | 5                        | 2                          | OT                      | OB                      | 0                              | IMP                        | LB                        | 1.00            | Y                    | S                        |
| Spangenberg & Sprott (2006)     | 1(2)                            | PRED                     | NO               | NO              | 1                          | 1                      | VAR                       | HEA                    | 5                        | 2                          | OT                      | OB                      | 0                              | IMP                        | LB                        | 1.00            | Y                    | S                        |
| Spangenberg & Sprott (2006)     | 2(1)                            | PRED                     | NO               | NO              | 1                          | 1                      | VAR                       | PRO                    | 5                        | 3                          | OT                      | OB                      | 0                              | IMP                        | LB                        | 1.00            | Y                    | S                        |
| Spangenberg & Sprott (2006)     | 2(2)                            | PRED                     | NO               | NO              | 1                          | 1                      | VAR                       | PRO                    | 5                        | 3                          | OT                      | OB                      | 0                              | IMP                        | LB                        | 1.00            | Y                    | S                        |
| Spangenberg (1997)              | 1(1)                            | PRED                     | NO               | NO              | 1                          | 2                      | HI                        | HEA                    | 5                        | 4                          | REP                     | OB                      | 180                            | PER                        | FD                        | 1.00            | N                    | NS                       |
| Spangenberg (1997)              | 1(2)                            | PRED                     | NO               | NO              | 1                          | 2                      | HI                        | HEA                    | 5                        | 4                          | REP                     | OB                      | 10                             | PER                        | FD                        | 1.00            | N                    | NS                       |
| Spence et al. (2009)            | 1(1)                            | INT                      | NO               | NO              | 1                          | 17                     | NO                        | HEA                    | 5                        | 1                          | REP                     | OB                      | 7                              | IMP                        | FD                        | 1.00            | N                    | S                        |
| Spence et al. (2009)            | 1(2)                            | INT                      | NO               | NO              | 1                          | 17                     | NO                        | HEA                    | 5                        | 1                          | REP                     | SR                      | 7                              | IMP                        | FD                        | 1.00            | N                    | S                        |
| Spence et al. (2009)            | 1(3)                            | INT                      | NO               | NO              | 1                          | 17                     | NO                        | HEA                    | 5                        | 1                          | REP                     | SR                      | 7                              | IMP                        | FD                        | 1.00            | N                    | S                        |

| Author(s) and publication year         | Study (comparison) <sup>a</sup> | Question characteristics |                  |                 |                            |                        | Behaviour characteristics |                        |                          |                            |                         |                         | Methodological characteristics |                            |                           |                 |                      |                          |
|----------------------------------------|---------------------------------|--------------------------|------------------|-----------------|----------------------------|------------------------|---------------------------|------------------------|--------------------------|----------------------------|-------------------------|-------------------------|--------------------------------|----------------------------|---------------------------|-----------------|----------------------|--------------------------|
|                                        |                                 | Q Type <sup>b</sup>      | TPB <sup>c</sup> | AR <sup>d</sup> | N Pred/Int Qs <sup>e</sup> | N Beh. Qs <sup>f</sup> | Beh. Exp. <sup>g</sup>    | Beh. Dom. <sup>h</sup> | Social Des. <sup>i</sup> | Diff. of Beh. <sup>j</sup> | Beh. Freq. <sup>k</sup> | Beh. Meas. <sup>l</sup> | Time Int. <sup>m</sup>         | Pers. Contact <sup>n</sup> | Res. Setting <sup>o</sup> | RR <sup>p</sup> | Incent. <sup>q</sup> | Sample Type <sup>r</sup> |
| Sprott et al. (1999)                   | 1                               | PRED                     | NO               | NO              | 1                          | 1                      | VAR                       | PRO                    | 5                        | 2                          | REP                     | OB                      | 77                             | IMP                        | FD                        | 0.60            | N                    | S                        |
| Sprott et al. (1999)                   | 2                               | PRED                     | NO               | NO              | 1                          | 2                      | VAR                       | PRO                    | 5                        | 2                          | REP                     | OB                      | 105                            | IMP                        | FD                        | 0.60            | N                    | S                        |
| Sprott et al. (2003)                   | 1(1)                            | PRED                     | TPB              | NO              | 1                          | 1                      | VAR                       | HEA                    | 3                        | 3                          | OT                      | OB                      | 0                              | IMP                        | LB                        | 1.00            | N                    | S                        |
| Sprott et al. (2003)                   | 1(2)                            | PRED                     | TPB              | NO              | 1                          | 1                      | VAR                       | HEA                    | 3                        | 3                          | OT                      | OB                      | 0                              | IMP                        | LB                        | 1.00            | N                    | S                        |
| Sprott et al. (2003)                   | 2(1)                            | PRED                     | TPB              | NO              | 1                          | 6                      | VAR                       | HEA                    | 5                        | 3                          | OT                      | OB                      | 0                              | IMP                        | LB                        | 1.00            | N                    | S                        |
| Sprott et al. (2003)                   | 2(2)                            | PRED                     | TPB              | NO              | 1                          | 6                      | VAR                       | HEA                    | 4                        | 3                          | OT                      | OB                      | 0                              | IMP                        | LB                        | 1.00            | N                    | S                        |
| Sprott et al. (2004)                   | 1                               | PRED                     | NO               | NO              | 1                          | 1                      | VAR                       | HEA                    | 5                        | 2                          | OT                      | OB                      | 0                              | IMP                        | LB                        | 1.00            | N                    | S                        |
| Sprott et al. (2004)                   | 2(1)                            | PRED                     | NO               | NO              | 1                          | 1                      | VAR                       | HEA                    | 5                        | 2                          | OT                      | OB                      | 0                              | IMP                        | LB                        | 1.00            | N                    | S                        |
| Sprott et al. (2004)                   | 2(2)                            | PRED                     | NO               | NO              | 1                          | 1                      | VAR                       | HEA                    | 5                        | 2                          | OT                      | OB                      | 0                              | IMP                        | LB                        | 1.00            | N                    | S                        |
| Van Kerckhove, Geuens & Vermeir (2012) | 1(1)                            | PRED                     | NO               | NO              | 1                          | 2                      | NO                        | CON                    | 3                        | 1                          | OT                      | OB                      | 0                              | IMP                        | LB                        | 1.00            | N                    | S                        |
| Van Kerckhove, Geuens & Vermeir (2012) | 1(2)                            | PRED                     | NO               | NO              | 1                          | 2                      | NO                        | CON                    | 3                        | 1                          | OT                      | OB                      | 0                              | IMP                        | LB                        | 1.00            | N                    | S                        |
| Van Kerckhove, Geuens & Vermeir (2012) | 2A                              | PRED                     | NO               | NO              | 1                          | 2                      | NO                        | CON                    | 3                        | 1                          | OT                      | OB                      | 0                              | IMP                        | LB                        | 1.00            | N                    | S                        |
| Van Kerckhove, Geuens & Vermeir (2012) | 2B                              | PRED                     | NO               | NO              | 1                          | 4                      | VAR                       | CON                    | 3                        | 1                          | OT                      | OB                      | 0                              | IMP                        | LB                        | 1.00            | N                    | S                        |
| Van Kerckhove, Geuens & Vermeir (2012) | 3(1)                            | PRED                     | NO               | NO              | 1                          | 2                      | NO                        | CON                    | 3                        | 1                          | OT                      | OB                      | 0                              | IMP                        | LB                        | 1.00            | N                    | MIX                      |
| Van Kerckhove, Geuens & Vermeir (2012) | 3(2)                            | PRED                     | NO               | NO              | 1                          | 2                      | NO                        | CON                    | 3                        | 1                          | OT                      | OB                      | 0                              | IMP                        | LB                        | 1.00            | N                    | MIX                      |
| Williams et al. (2004)                 | 1(1)                            | PRED                     | NO               | NO              | 1                          | 1                      | VAR                       | UND                    | 1                        | 2                          | REP                     | SR                      | 7                              | IMP                        | FD                        | 1.00            | N                    | S                        |
| Williams et al. (2004)                 | 1(2)                            | PRED                     | NO               | NO              | 1                          | 1                      | VAR                       | UND                    | 1                        | 2                          | REP                     | SR                      | 7                              | IMP                        | FD                        | 1.00            | N                    | S                        |
| Williams et al. (2004)                 | 1(3)                            | PRED                     | NO               | NO              | 1                          | 1                      | VAR                       | UND                    | 1                        | 2                          | REP                     | SR                      | 7                              | IMP                        | FD                        | 1.00            | N                    | S                        |
| Williams et al. (2004)                 | 1(4)                            | PRED                     | NO               | NO              | 1                          | 1                      | VAR                       | HEA                    | 4                        | 2                          | REP                     | SR                      | 7                              | IMP                        | FD                        | 1.00            | N                    | S                        |
| Williams et al. (2004)                 | 1(5)                            | PRED                     | NO               | NO              | 1                          | 1                      | VAR                       | HEA                    | 4                        | 2                          | REP                     | SR                      | 7                              | IMP                        | FD                        | 1.00            | N                    | S                        |
| Williams et al. (2004)                 | 1(6)                            | PRED                     | NO               | NO              | 1                          | 1                      | VAR                       | HEA                    | 4                        | 2                          | REP                     | SR                      | 7                              | IMP                        | FD                        | 1.00            | N                    | S                        |
| Williams et al. (2004)                 | 2(1)                            | PRED                     | NO               | NO              | 1                          | 1                      | VAR                       | UND                    | 1                        | 2                          | REP                     | SR                      | 7                              | IMP                        | FD                        | 1.00            | N                    | S                        |
| Williams et al. (2004)                 | 2(2)                            | PRED                     | NO               | NO              | 1                          | 1                      | VAR                       | UND                    | 1                        | 2                          | REP                     | SR                      | 7                              | IMP                        | FD                        | 1.00            | N                    | S                        |
| Williams et al. (2004)                 | 2(3)                            | PRED                     | NO               | NO              | 1                          | 1                      | VAR                       | UND                    | 1                        | 2                          | REP                     | SR                      | 7                              | IMP                        | FD                        | 1.00            | N                    | S                        |
| Williams et al. (2004)                 | 2(4)                            | PRED                     | NO               | NO              | 1                          | 1                      | VAR                       | HEA                    | 4                        | 2                          | REP                     | SR                      | 7                              | IMP                        | FD                        | 1.00            | N                    | S                        |
| Williams et al. (2004)                 | 2(5)                            | PRED                     | NO               | NO              | 1                          | 1                      | VAR                       | HEA                    | 4                        | 2                          | REP                     | SR                      | 7                              | IMP                        | FD                        | 1.00            | N                    | S                        |
| Williams et al. (2004)                 | 2(6)                            | PRED                     | NO               | NO              | 1                          | 1                      | VAR                       | HEA                    | 4                        | 2                          | REP                     | SR                      | 7                              | IMP                        | FD                        | 1.00            | N                    | S                        |
| Williams et al. (2004)                 | 2(7)                            | PRED                     | NO               | NO              | 1                          | 1                      | VAR                       | HEA                    | 4                        | 2                          | REP                     | SR                      | 7                              | IMP                        | FD                        | 1.00            | N                    | S                        |
| Williams et al. (2004)                 | 3(1)                            | PRED                     | NO               | NO              | 1                          | 1                      | VAR                       | UND                    | 1                        | 2                          | OT                      | OB                      | 7                              | IMP                        | LB                        | 1.00            | N                    | MIX                      |
| Williams et al. (2004)                 | 3(2)                            | PRED                     | NO               | NO              | 1                          | 1                      | VAR                       | UND                    | 1                        | 2                          | OT                      | OB                      | 7                              | IMP                        | LB                        | 1.00            | N                    | MIX                      |
| Williams et al. (2004)                 | 3(3)                            | PRED                     | NO               | NO              | 1                          | 1                      | VAR                       | UND                    | 1                        | 2                          | OT                      | OB                      | 7                              | IMP                        | LB                        | 1.00            | N                    | MIX                      |
| Williams et al. (2004)                 | 3(4)                            | PRED                     | NO               | NO              | 1                          | 1                      | VAR                       | UND                    | 1                        | 2                          | OT                      | OB                      | 7                              | IMP                        | LB                        | 1.00            | N                    | MIX                      |
| Williams et al. (2004)                 | 4(1)                            | PRED                     | NO               | NO              | 1                          | 4                      | VAR                       | PRO                    | 4                        | 1                          | OT                      | OB                      | 0                              | IMP                        | LB                        | 1.00            | N                    | MIX                      |
| Williams et al. (2004)                 | 4(2)                            | PRED                     | NO               | NO              | 1                          | 4                      | VAR                       | PRO                    | 4                        | 1                          | OT                      | OB                      | 0                              | IMP                        | LB                        | 1.00            | N                    | MIX                      |
| Williams et al. (2006)                 | 1(1)                            | PRED                     | NO               | NO              | 1                          | 1                      | VAR                       | UND                    | 1                        | 4                          | REP                     | SR                      | 60                             | IMP                        | FD                        | 1.00            | Y                    | S                        |
| Williams et al. (2006)                 | 1(2)                            | PRED                     | NO               | NO              | 1                          | 1                      | VAR                       | HEA                    | 3                        | 3                          | REP                     | SR                      | 60                             | IMP                        | FD                        | 1.00            | Y                    | S                        |

Note. <sup>a</sup>The number in parentheses indicates where multiple effect sizes were included for a single study, when studies reported more than one behavioral observation for the same group of participants that were equally integral to the moderator analyses. See Appendix A for descriptions of the comparisons in this column. <sup>b</sup>The type of question used to invoke the QBE, where MIX = Mixed, PRED = Prediction/Expectation, INT = Intention. <sup>c</sup>Whether additional questions based on the Theory of Planned Behavior were included, where TPB = Additional Theory of Planned

Behavior items present, NO = No additional Theory of Planned Behavior items present. <sup>d</sup>Whether additional questions measuring anticipated regret were included, where AR = Anticipated Regret items present, NO = No Anticipated Regret items present. <sup>e</sup>The number of items asking participants to report behavioral intentions or predictions. <sup>f</sup>The total number of items relating to the behavior. <sup>g</sup>The participant sample's likely level of experience with the behavior, where HI = High Experience, NO = No Experience, VAR = Varied Experience. <sup>h</sup>The type of behavior targeted, where HEA = Health behaviors, PRO = Prosocial behaviors, UND = Undesirable or risky behaviors, CON = Consumer behaviors, and OTH = Unclassified other behaviors. <sup>i</sup>Social desirability of behavior, such that higher scores indicate greater desirability. <sup>j</sup>Difficulty to perform the behavior, such that higher scores indicate greater difficulty. <sup>k</sup>Whether the behavior was measured as a one-time occurrence or repeated behavior, where OT = One-time and REP = Repeated. <sup>l</sup>Whether behavior was measured using objective or self-report measures, where OB = Objective measures, and SR = Self-report measures. <sup>m</sup>Time between measurement of intention/prediction and measurement of behavior in days. <sup>n</sup>Whether intentions/predictions were reported via personal contact with the experimenter, where PER = Personal Contact and IMP = Impersonal Contact. <sup>o</sup>The setting in which behavior was measured, where LB = Behavior measured in the laboratory, and FD = Behavior measured in the field. <sup>p</sup>Response rate to the instrument (e.g. questionnaire) measuring intentions/predictions. Scores of 1 indicate lab-based studies with 100% response rates. <sup>q</sup>Whether an incentive was given for participation, where Y = Yes, and N = No. <sup>r</sup>The nature of the participant sample, where S = Student, NS = Non-student, and MIX= Mixed or unreported sample type.
